# Supplementary material for: ErbB3-Targeting Oncolytic Adenovirus Causes Potent Tumor Suppression by Induction of Apoptosis in Cancer Cells
Source: MDPI journal article supplement (doi:10.3390/ijms23137127), 2022-06-27
Supplement: s1 [file s1]

## Article

# ErB3-targeting oncolytic adenovirus causes potent tumor suppression by induction of apoptosis in cancer cells

Bo-Kyeong Jung<sup>1,2</sup>, Young Jun Kim<sup>1</sup>, JinWoo Hong<sup>1,2</sup>, Han-Gyu Chang<sup>1</sup>, A-Rum Yoon<sup>1,3,4</sup>, and Chae-Ok Yun<sup>1,2,3,4\*</sup>

- <sup>1</sup> Department of Bioengineering, College of Engineering, Hanyang University, 222 Wangsimni-ro, Seongdong-gu, Seoul 04763, Republic of Korea; yeesule@hanyang.ac.kr (B.-K.J.); mark95@hanyang.ac.kr (Y.J.K.); jhong803@gmail.com (J.H.); charley26@hanyang.ac.kr (H.-G.C.); ayoon@hanyang.ac.kr (A.-R.Y.); chaeok@hanyang.ac.kr (C.-O.Y.)
- <sup>2</sup> GeneMedicine Co., Ltd., Seoul, 04763, Republic of Korea
- <sup>3</sup> Institute of Nano Science and Technology (INST), Hanyang University, 222 Wangsimni-ro, Seongdong-gu, Seoul 04763, Republic of Korea
- <sup>4</sup> Hanyang Institute of Bioscience and Biotechnology (HY-IBB), Hanyang University, 222 Wangsimni-ro, Seongdong-gu, Seoul 04763, Republic of Korea
- \* Correspondence: chaeok@hanyang.ac.kr (C.-O.Y.)

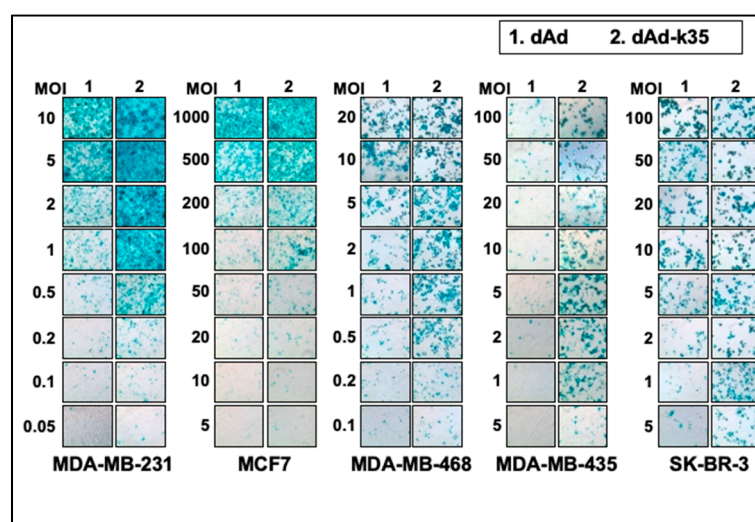

**Supplementary Figure S1. Enhanced transduction efficiency of dAd-k35-LacZ.** Human breast cancer cells (MDA-MB-231, MCF7, MDA-MB-468, MDA-MB-435, and SK-BR-3) were transduced with dAd-LacZ (lane 1) or dAd-k35-LacZ (lane 2) with various amount of virus (0.05 - 1000 MOI). At 48 h post-transduction, cells transduced with dAd-LacZ or dAd-k35-dAd-LacZ were stained with X-gal for analyzing the  $\beta$ -galactosidase.

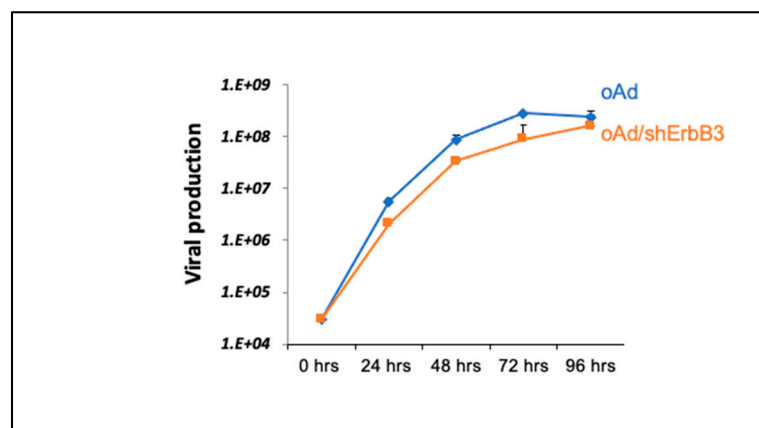

**Supplementary Figure S2. Viral replication of oAd and oAd/shErbB3.** MDA-MB-231 cells seeded in a 12-well plate were infected at MOI of 0.1 with oAd or oAd/shErbB3. At 0, 24, 48, 72, or 96 h post infection, viral genome copy numbers were measured by Q-PCR.

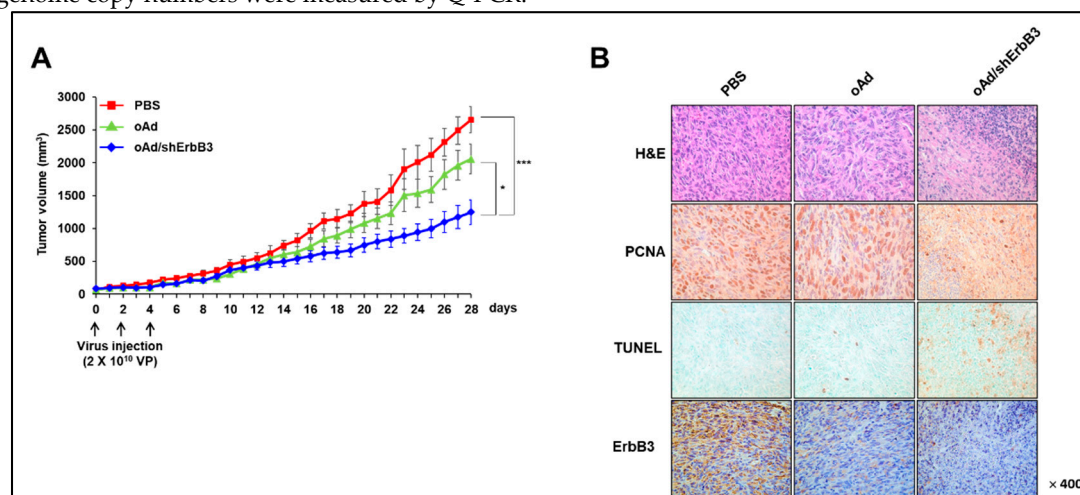

**Supplementary Figure S3. Tumor growth inhibition by shErbB3-expressing oncolytic Ad.** MCF-7/Mot tumor-bearing mice were injected with  $2 \times 10^{10}$  VP of either oAd or oAd/shErbB3 along with PBS control (Q2D  $\times$  3). \* $p < 0.01$  or \*\*\* $p < 0.001$ . **(A)** Tumor volume was measured every other day. Data represent as mean  $\pm$  SE ( $n = 5$  to 8). **(B)** Histological and immunohistochemical analysis. Tumors treated with PBS, oAd, or oAd/shErbB3 were harvested and subjected to H & E staining and immunohistochemical staining for PCNA, TUNEL, and ErbB3, respectively.
